# Supplementary material
Source: MDPI journal article supplement (https://www.mdpi.com/1424-8220/11/5/4674)

# Supplementary Information

**Figure S1.** Capacitance measurement.

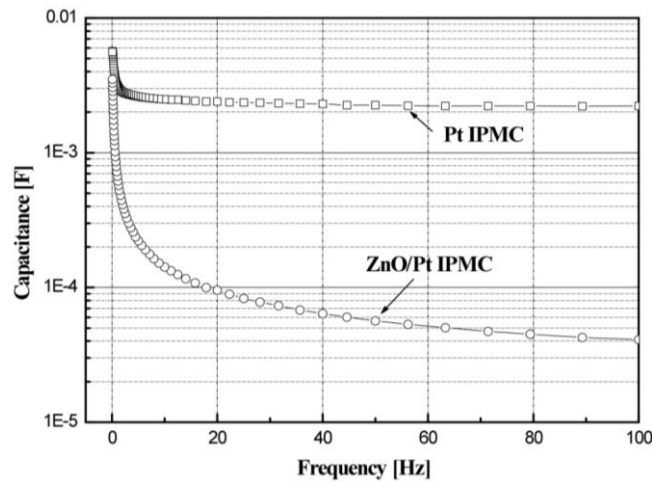

**Figure S2.** Electro-mechanical property of (a) Pt IPMC and (b) IPMZC: the out potential (blue) and corresponding displacement result (black) in applied current input (-200 to 200 mA).

## Actuation Response

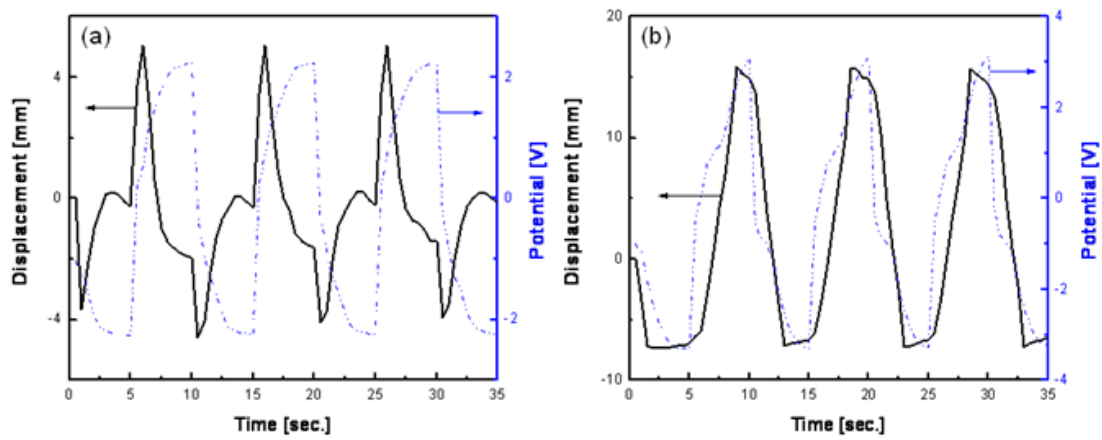

**Figure S3.** Mechano-optical property of IPMZC: PL intensity (PLI) at the curvature of 50.25/m.

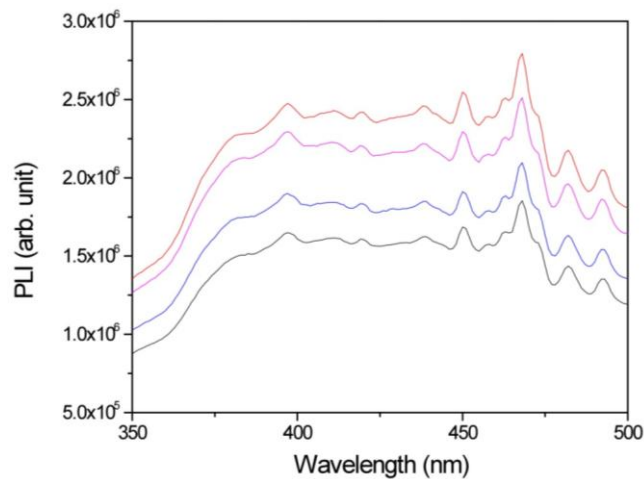

Supplement: s1 [file s1]
